# Supplementary material for: Activation of persulfate by Co3O4 nanoparticles for orange G degradation
Source: Royal Society of Chemistry journal article supplement (doi:10.1039/c5ra22457h), 2015-12-17
Supplement: c5ra22457h1.pdf [file c5ra22457h1.pdf]

## Supporting information

### **Activation of persulfate by Co<sub>3</sub>O<sub>4</sub> nanoparticles for orange G degradation**

Jing Zhang<sup>1,\*</sup>, Mengyan Chen<sup>1</sup>, Liang Zhu<sup>1,\*</sup>

1. Key Laboratory of Integrated Regulation and Resource Development on Shallow  
Lakes of Ministry of Education, College of Environment, Hohai University, Nanjing,  
210098, China

Contact information for corresponding author:

Jing Zhang, E-mail: zhang\_jing@hhu.edu.cn, telephone: 86-15050556980

Liang Zhu, E-mail: zhulianghhu@163.com

### **Text S1 The preparation of nano-Co<sub>3</sub>O<sub>4</sub>.**

Nano-Co<sub>3</sub>O<sub>4</sub> was prepared by precipitation method using cobalt nitrate as the precursor in the presence of CTAB. In a typical synthesis, 12.5 mmol of Co(NO<sub>3</sub>)<sub>2</sub> • 6H<sub>2</sub>O and 2.5 mmol of CTAB were dissolved in 750 mL deionized water, in a 1000 mL round bottom flask, giving a pink solution. After stirring for 20 min, 249.0 mmol of triethylamine (TEA) was rapidly added into the pink solution under vigorous agitation, giving a blue mixture. Then, the blue mixture was stirred at 348 K for 8 h, and the color of the mixture changed into black. The as-synthesized cobalt oxide was obtained by centrifugation and then dried at 353 K for 48 h. The dried material was treated by Soxhlet extraction over ethanol for 48 h to remove stabilizers. The obtained solid was calcined at 573 K under flowing air for 2 h after drying at 373 K for 8 h.

## **Text S2 Details of experiments to assess the leaching of nano-Co<sub>3</sub>O<sub>4</sub> and the catalytic performance of dissolved Co ions.**

To evaluate the leaching of Co from nano-Co<sub>3</sub>O<sub>4</sub>, 10 mL samples were withdrawn with plastic syringes at fixed time intervals during batch experiment and mixed immediately with appropriate amounts of methanol to quench any further oxidation reactions, and then the solution and nano-Co<sub>3</sub>O<sub>4</sub> catalyst were separated by filtration. The concentrations of dissolved Co ions were determined by ICP-AES after microwave digestion in the mixture of nitric acid and hydrogen peroxide.

To evaluate the catalytic performance of dissolved Co ions, batch experiments were performed open to the air and in a series of 500-mL borosilicate glass jars that were placed in a water bath to keep temperature constant. The dosage of Co<sup>2+</sup> was set according the maximum dissolved Co ions at the end of reactions in heterogeneous reaction. Before dosing catalyst, pH of the solution containing PS and OG was adjusted to the predetermined value with NaOH or HClO<sub>4</sub>. At the given time intervals, the samples aliquots were collected with syringes and mixed immediately with appropriate amounts of methanol to quench any further oxidation reactions. The samples were filtered through a 0.22 μm membrane filter before measurement.

### **Text S3 Detailed parameters and procedure of EPR experiments**

5, 5-dimethyl-1-pyrrolidine N-oxide (DMPO) was used as a spin-trapping agent. The mixture of DMPO and sample was mixed for 30 s and then sampled by a capillary tube, which was inserted into the EPR cavity. EPR experiments were performed on a Bruker A200 spectrometer. The condition was: a center field of 353.5 mT, a sweep width of 7 mT, a sweep time of 81.92 s, a modulation frequency of 100 kHz, a modulation amplitude of 0.05 mT, a microwave frequency of 9.85 GHz, and a microwave power of 6.1 mW.

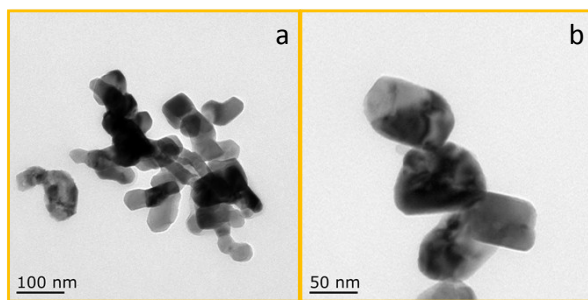

Fig. S1 TEM for virgin nano-Co<sub>3</sub>O<sub>4</sub> (a) and spent nano-Co<sub>3</sub>O<sub>4</sub> after five consecutive runs (b).

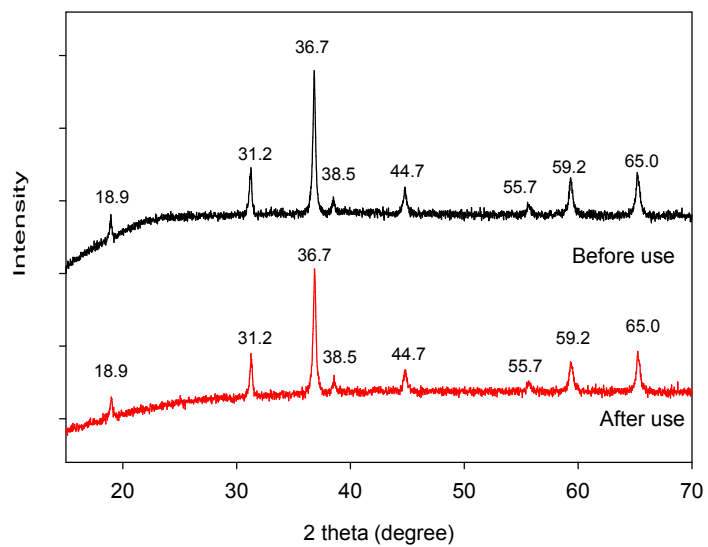

Fig. S2 XRD patterns for virgin nano-Co<sub>3</sub>O<sub>4</sub> and spent nano-Co<sub>3</sub>O<sub>4</sub> after five consecutive runs.

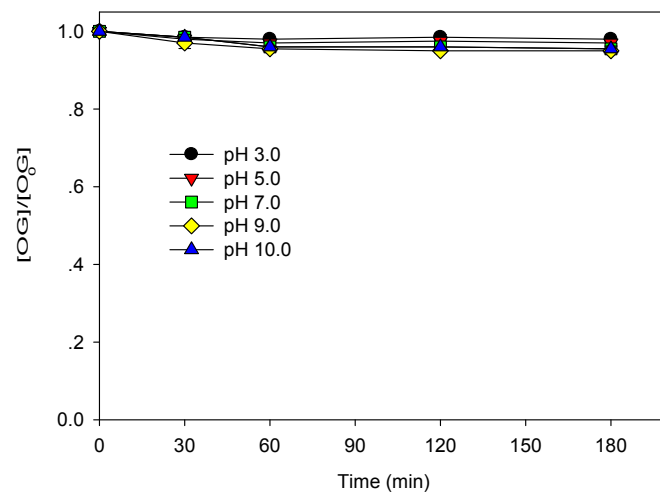

Fig. S3 Removal of OG by PS alone at various pH. Reaction conditions:  $[OG]_0 = 0.1$  mM,  $[PS]_0 = 2.0$  mM,  $T=25$  °C.

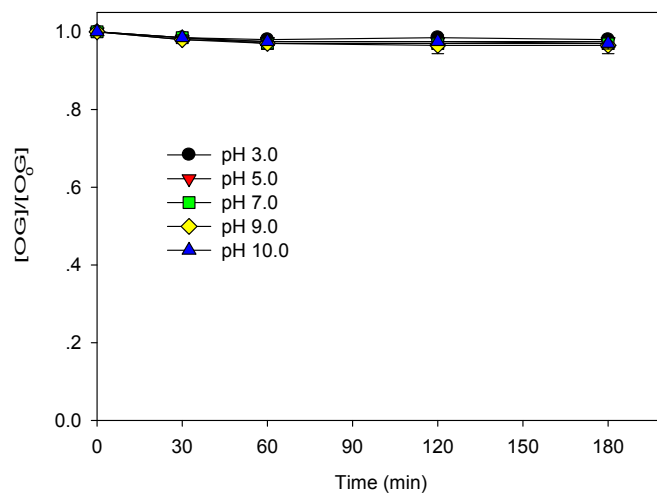

Fig. S4 Removal of OG by nano- $\text{Co}_3\text{O}_4$  adsorption at various pH. Reaction conditions:

$[\text{OG}]_0 = 0.1 \text{ mM}$ ,  $[\text{nano-}\text{Co}_3\text{O}_4]_0 = 2.0 \text{ g L}^{-1}$ ,  $T = 25 \text{ }^\circ\text{C}$ .



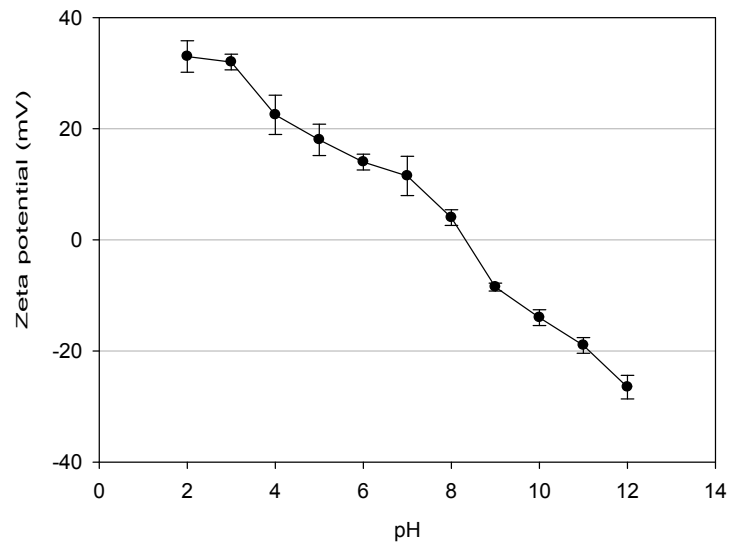

Fig. S5 Zeta potential versus pH for nano-Co<sub>3</sub>O<sub>4</sub> in deionized water.

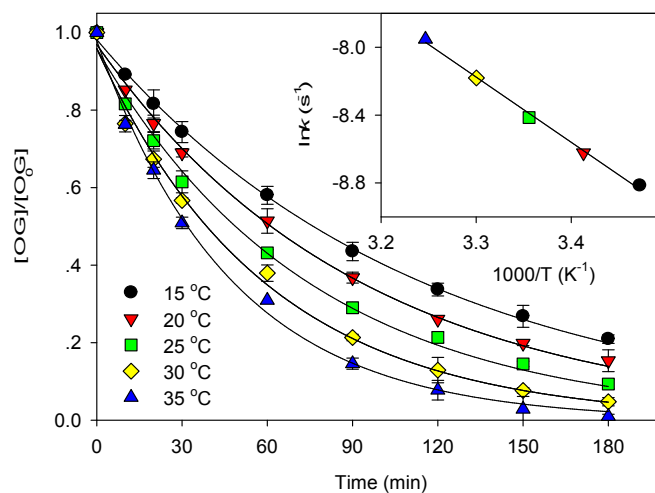

Fig. S6 Degradation of OG in nano-Co<sub>3</sub>O<sub>4</sub>/PS system at different temperatures. Inset indicates the Arrhenius plot for the OG degradation rate constants at 10, 15, 20, 25 and 30 °C. (Reaction conditions: [OG]=0.1 mM, [PS]=2 mM, [nano-Co<sub>3</sub>O<sub>4</sub>]=0.5 g L<sup>-1</sup>, pH=7.0±0.1, T=15-35 °C).

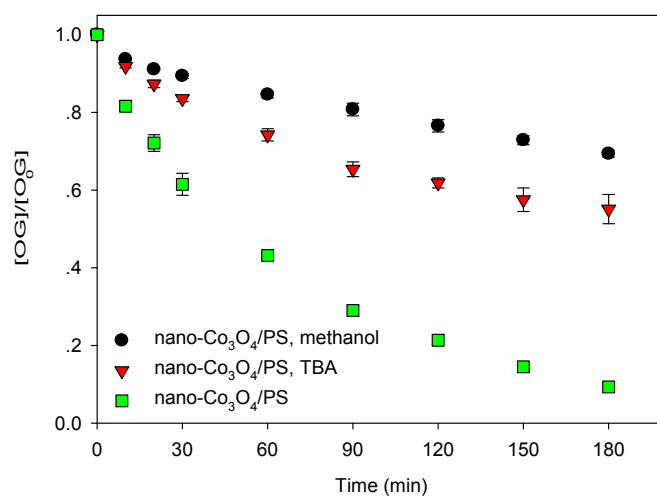

Fig. S7 Oxidation of OG in nano-Co<sub>3</sub>O<sub>4</sub>/PS system in the presence of TBA or methanol (Reaction conditions: [OG]=0.1 mM, [PS]=2 mM, [nano-Co<sub>3</sub>O<sub>4</sub>]=0.5 g L<sup>-1</sup>, [TBA]=10 mM, [methanol]=10 mM, pH=7.0±0.1, T=25 °C).

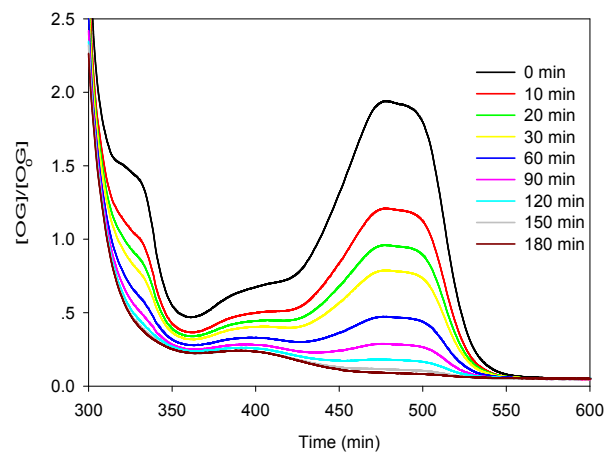

Fig. S8 Variation of the UV-Vis spectra of OG with time in the nano- $\text{Co}_3\text{O}_4/\text{PS}$  system (Reaction conditions:  $[\text{OG}]_0=0.1 \text{ mM}$ ,  $[\text{PS}]_0=2.0 \text{ mM}$ ,  $[\text{nano-}\text{Co}_3\text{O}_4]_0=0.5 \text{ g L}^{-1}$ ,  $\text{pH}=7.0\pm 0.1$ ,  $T=25 \text{ }^\circ\text{C}$ ).

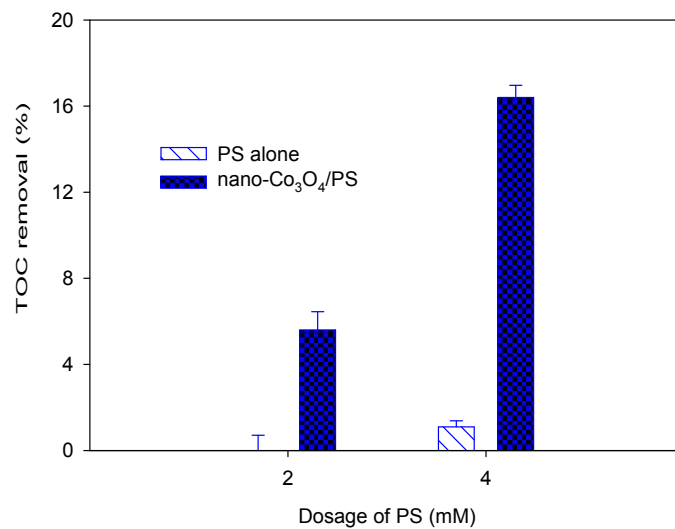

Fig. S9 Influence of nano-Co<sub>3</sub>O<sub>4</sub> on mineralization of OG by PS at different PS dosages (Reaction conditions: [OG]<sub>0</sub>=0.1 mM, [nano-Co<sub>3</sub>O<sub>4</sub>]<sub>0</sub>=0.5 g L<sup>-1</sup>, pH=7.0±0.1, T=25 °C, reaction time=3 h).

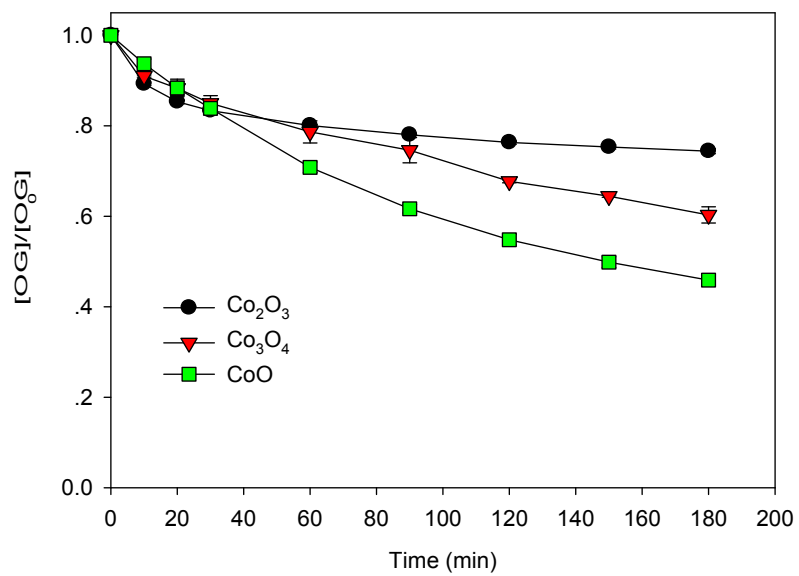

Fig. S10 Oxidation of OG by PS with  $Co_2O_3$ ,  $Co_3O_4$  and  $CoO$  (Reaction conditions:  $[OG]=0.1$  mM,  $[PS]=2$  mM,  $[Co_2O_3]=[Co_3O_4]=[CoO]=2.08$  mM (the mass of  $Co_3O_4$  was  $0.5$  g  $L^{-1}$  with the dosage of  $2.08$  mM),  $pH=7.0\pm 0.1$ ,  $T=25$  °C).

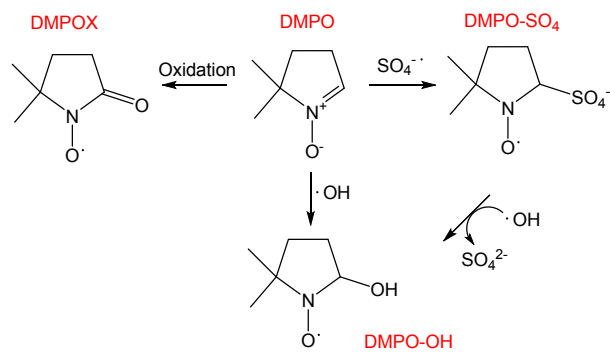

Scheme S1. Formation of DMPO-SO<sub>4</sub> and DMPO-OH adducts, and DMPOX radicals.

Table S1 BET, the first order reaction rate constant ( $k$ ) and the specific rate constant

( $k_{SA}$ ) normalized by BET surface area for  $\text{Co}_3\text{O}_4$  and nano- $\text{Co}_3\text{O}_4$ .

|                               | BET surface area ( $\text{m}^2 \text{g}^{-1}$ ) | $k$ ( $\text{s}^{-1}$ ) | $k_{SA}$ ( $\text{g m}^{-2} \text{s}^{-1}$ ) |
|-------------------------------|-------------------------------------------------|-------------------------|----------------------------------------------|
|                               | 1)                                              |                         |                                              |
| $\text{Co}_3\text{O}_4$       | 4.9                                             | $4.50 \times 10^{-5}$   | $9.18 \times 10^{-6}$                        |
| Nano- $\text{Co}_3\text{O}_4$ | 18.1                                            | $2.22 \times 10^{-4}$   | $1.23 \times 10^{-5}$                        |



Table S2 The information of OG and the identified OG degradation products.

| Peak number | Retention time (min) | Proposed molecular formula | Molecular weight |
|-------------|----------------------|----------------------------|------------------|
| Orange G    | 6.71                 | $C_{16}H_{12}N_2O_7S_2$    | 408              |
| A           | 6.44                 | $C_{16}H_{12}N_2O_4S$      | 328              |
| B           | 7.05                 | $C_{16}H_{12}N_2O_3S$      | 312              |
| C           | 4.73                 | $C_{16}H_{10}N_2O_4S$      | 326              |
| D           | 7.64                 | $C_{16}H_{10}N_2O_5S$      | 342              |
| E           | 5.51                 | $C_{10}H_{10}O_7S_2$       | 304              |
| F           | 6.32                 | $C_{10}H_8O_8S_2$          | 320              |
| G           | 8.04                 | $C_{10}H_8O_9S_2$          | 336              |
| H           | 5.86                 | $C_{10}H_6O_9S_2$          | 334              |
| I           | 6.49                 | $C_{10}H_8N_2O_7S_2$       | 332              |
| J           | 6.54                 | $C_{10}H_8N_2O_6S_2$       | 316              |
| K           | 7.14                 | $C_{10}H_6N_2O_7S_2$       | 330              |
| L           | 6.02                 | $C_{10}H_8N_2O_8S_2$       | 348              |
| M           | 1.64                 | $C_{10}H_8N_2O_9S_2$       | 364              |
| N           | 7.18                 | $C_{10}H_8N_2O_{10}S_2$    | 380              |
| O           | 6.52                 | $C_{16}H_{12}N_2O_6S_2$    | 392              |
